# Supplementary material for: Exploration of the Regulatory Pathways and Key Genes Involved in the Response to Saline–Alkali Stress in Betula platyphylla via RNA-Seq Analysis
Source: MDPI journal article supplement (doi:10.3390/plants12132435), 2023-06-24
Supplement: s1 [file s1]

**Table S1:** RNA-seq data statistics

| Names      |      | GC Content | %≥Q30  |
|------------|------|------------|--------|
| Control    | ck-1 | 46.6%      | 93.95% |
|            | ck-2 | 46.65%     | 93.68% |
|            | ck-3 | 46.43%     | 93.6%  |
| NaHCO3 3 h | N3-1 | 46.3%      | 93.5%  |
|            | N3-2 | 46.49%     | 92.83% |
|            | N3-3 | 46.45%     | 93.56% |
| NaHCO3 6 h | N6-1 | 46.44%     | 92.8%  |
|            | N6-2 | 46.43%     | 93.01% |
|            | N6-3 | 46.45%     | 93.54% |

**Table S2** The alignment statistics of the sequencing data against the reference genome

| Names                  |      | Total Reads | Mapped Reads           | Uniq Mapped Reads      | Multiple Map Reads   | Reads Map to '+'       | Reads Map to '-'       |
|------------------------|------|-------------|------------------------|------------------------|----------------------|------------------------|------------------------|
| Control                | ck-1 | 45,882,766  | 42,340,738<br>(92.28%) | 41,306,864<br>(90.03%) | 1,033,874<br>(2.25%) | 21,823,009<br>(47.56%) | 21,857,358<br>(47.64%) |
|                        | ck-2 | 44,678,562  | 41,588,698<br>(93.08%) | 40,602,072<br>(90.88%) | 986,626<br>(2.21%)   | 21,400,152<br>(47.90%) | 21,439,696<br>(47.99%) |
|                        | ck-3 | 43,845,858  | 40,467,813<br>(92.30%) | 39,574,236<br>(90.26%) | 893,577<br>(2.04%)   | 20,796,645<br>(47.43%) | 20,817,791<br>(47.48%) |
| NaHCO <sub>3</sub> 3 h | N3-1 | 54,155,330  | 50,068,330<br>(92.45%) | 48,924,515<br>(90.34%) | 1,143,815<br>(2.11%) | 25,747,176<br>(47.54%) | 25,781,187<br>(47.61%) |
|                        | N3-2 | 41,592,742  | 38,457,038<br>(92.46%) | 37,573,043<br>(90.34%) | 883,995<br>(2.13%)   | 19,779,094<br>(47.55%) | 19,804,249<br>(47.61%) |
|                        | N3-3 | 59,572,294  | 55,228,967<br>(92.71%) | 53,974,047<br>(90.60%) | 1,254,920<br>(2.11%) | 28,412,360<br>(47.69%) | 28,437,763<br>(47.74%) |
| NaHCO <sub>3</sub> 6 h | N6-1 | 52,658,328  | 48,754,408<br>(92.59%) | 47,637,470<br>(90.47%) | 1,116,938<br>(2.12%) | 25,066,454<br>(47.60%) | 25,105,916<br>(47.68%) |
|                        | N6-2 | 49,886,458  | 46,068,439<br>(92.35%) | 44,949,505<br>(90.10%) | 1,118,934<br>(2.24%) | 23,731,050<br>(47.57%) | 23,772,214<br>(47.65%) |
|                        | N6-3 | 51,890,900  | 47,989,877<br>(92.48%) | 46,877,643<br>(90.34%) | 1,112,234<br>(2.14%) | 24,691,964<br>(47.58%) | 24,724,644<br>(47.65%) |

**Table S4:** The primer sequences used for qRT-PCR analyses

| Primer              | Sequences(5'-3')      | Amplicon length (bp) |
|---------------------|-----------------------|----------------------|
| Ubiquitin-F         | GGAGGACAAGGTGGAGGG    | 228                  |
| Ubiquitin-R         | GATTGAGGGGAGGGATGC    |                      |
| $\alpha$ -tubulin-F | TGGCTCGAATGCACTGTTGG  | 215                  |
| $\alpha$ -tubulin-R | TCAACCGCCTTGTCTCTCAGG |                      |
| CYP82C2-F           | GTGGAACAGGGACAT       | 159                  |
| CYP82C2-R           | TTGGAAGAAAGAGCC       |                      |
| WRKY70-F            | CGATGATGTCACCCAC      | 157                  |
| WRKY70-R            | ATCGGCAAAGTGGTC       |                      |
| NAC9-F              | TTTGTGCCGAGTGTA       | 176                  |
| NAC9-R              | CTCCCGAGTAAGAAGT      |                      |
| RLP53-F             | GAAGGCTGAACACGC       | 180                  |
| RLP53-R             | TGAAGCTGCTCCAAA       |                      |
| ATJ11-F             | CCATTCAGCGTATTCA      | 159                  |

|          |                    |     |
|----------|--------------------|-----|
| ATJ11-R  | TCAGTCTCCCAGTTCC   |     |
| GSTF2-F  | CACATACCTGCCTTCG   |     |
| GSTF2-R  | GTGCCTCCACTTCCAT   | 160 |
| XTH6-F   | GCGATAGGGAACAAA    |     |
| XTH6-R   | CATCTTCGGGTAGGG    | 161 |
| XTH15-F  | GGGAAATCAAAGGAA    |     |
| XTH15-R  | TTGGGCATCTGTAGTT   | 158 |
| PMEI7-F  | AACCAGCTCAGCCAGTC  |     |
| PMEI7-R  | TCGCCTTCAACTTTCC   | 178 |
| WRKY41-F | AGATGCCATATCCTTT   |     |
| WRKY41-R | CTTGGAAGTTGCTCGT   | 168 |
| BG2-F    | GTGGAACAGGGACAT    |     |
| BG2-R    | TTGGAAGAAAGAGCC    | 177 |
| EARLI1-F | CTTCAACTTATGTCCCTT |     |
| EARLI1-R | GGTTTCTTTGGTGGG    | 187 |

**Table S5** Primers used for the construction of birch plants overexpressing *WRKY70* and *NAC9*

| Primer            | Sequences(5'-3')                           | Amplicon length (bp) |
|-------------------|--------------------------------------------|----------------------|
| WRKY70-Infusion-F | GACTCTAGAGGATCCCCGGGATGGAGTCTTCTTG<br>GCC  |                      |
| WRKY70-Infusion-R | ATTCGAGCTCGGTACCCGGGTAAAAAGAAAAG<br>GCACCC | 924                  |
| NAC9-Infusion-F   | GACTCTAGAGGATCCCCGGGATGGAGGAATTCG<br>CACC  |                      |
| NAC9-Infusion-R   | ATTCGAGCTCGGTACCCGGGTAAAGCCAATTCA<br>GTTGT | 744                  |

**Table S6** Primer sequences of *SOD* and *POD* used in qRT-PCR analyses

| Primer | Sequences(5'-3')      | Amplicon length (bp) |
|--------|-----------------------|----------------------|
| SOD1-F | CCGTGGTTGTTCTTGGCAAC  |                      |
| SOD1-R | CCAGCAGGATTGAAATGTGGC | 190                  |
| SOD2-F | TGCTCCTAAAGCGGTGGTTC  |                      |
| SOD2-R | GGGTTGAAATGAGGGCCAGT  | 195                  |
| SOD3-F | GAAGCCGCACTAGTAGCCAT  |                      |
| SOD3-R | ACGACAGTGAGTGGTTTGGC  | 191                  |
| SOD4-F | CGGAGGTCATATCAACCACTC |                      |
| SOD4-R | CAGACCAAGCCACACCCAT   | 190                  |
| SOD5-F | ATGTAGGTCTGGTGGTGCTTC | 195                  |

---

|        |                        |     |
|--------|------------------------|-----|
| SOD5-R | AGAGAAAGTGTGTGGATGGCTC |     |
| SOD6-F | CTTTGCTCTTTCCTCACTCT   |     |
| SOD6-R | ACAACCCTCGCATTTCAT     | 247 |
| POD1-F | ACTAAATCTACCACCACCC    |     |
| POD1-R | TGTATCGCCCTTTCCAG      | 172 |
| POD2-F | AGCATAAAAGAGCATCCCTC   |     |
| POD2-R | CACATCCAGACCCAGAAATT   | 179 |
| POD3-F | TTCATTGCGAGGGTTTG      |     |
| POD3-R | TGCTTGAGAAGGCAGATAG    | 248 |
| POD4-F | TACTGGACGCAAAGATGG     |     |
| POD4-R | AGGAAGGAAAGCGGAAT      | 244 |
| POD5-F | TGAGGTGAATGGGAAGAATG   |     |
| POD5-R | AGGTGATGTGGTTGGTGC     | 154 |
| POD6-F | CAAGTCGGCAGTTGAGAAT    |     |
| POD6-R | TGGAAAGGCCACATTAC      | 227 |
| POD7-F | ACATCTTAGCCGTTGTTGC    |     |
| POD7-R | GGCAGTGAGACCTTTGTTT    | 182 |
| POD8-F | TGTCAACAATTCTGGGCTAC   |     |
| POD8-R | CCACCCTACAGTTCTTCCT    | 191 |

---
